# Supplementary material for: Physical Activity Capacity Assessment of Patients with Chronic Disease and the Six-Minute Walk Test: A Cross-Sectional Study
Source: MDPI journal article supplement (doi:10.3390/healthcare10050758), 2022-04-19

Supplementary Files

Figure S1. Flow chart of patients

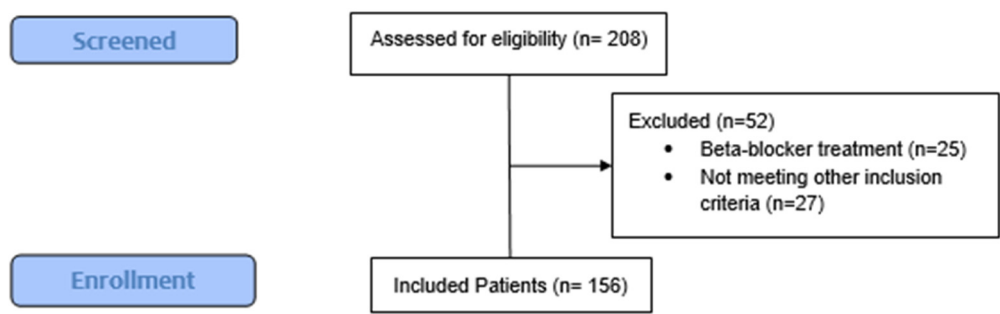

Figure S2. Scatter Graphs exercises capacities as a function of ages and BMI.

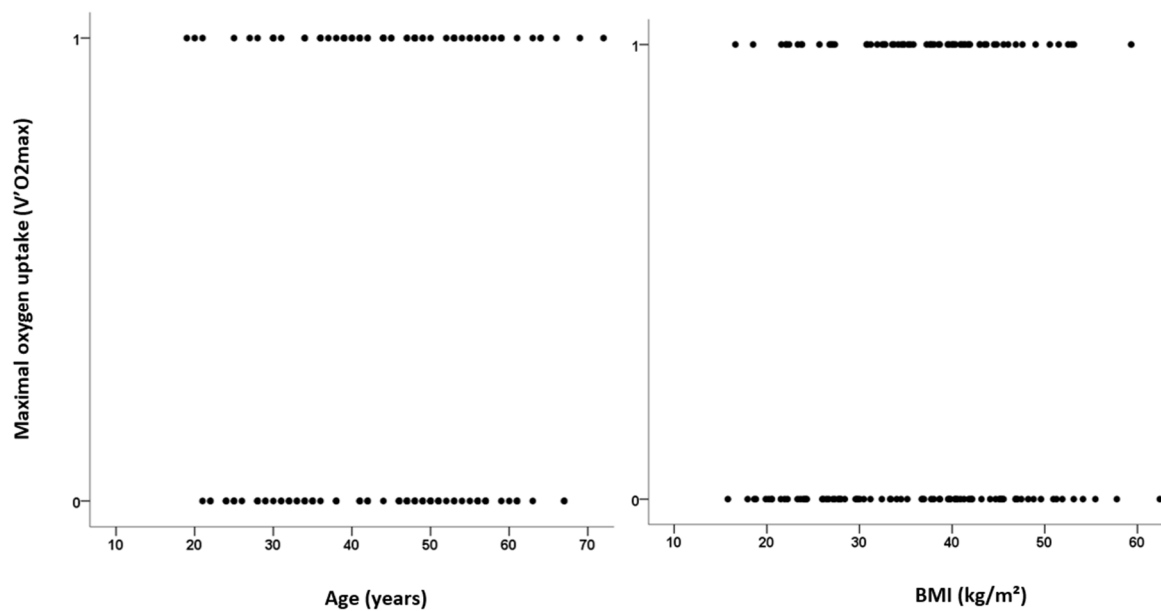

Supplement: s1 [file s1]
